# Supplementary material
Source: ML conference proceedings conference paper supplement (https://openaccess.thecvf.com/content/CVPR2024/html/Yang_Robust_Noisy_Correspondence_CVPR_2024_paper.html)
Supplement: Supplementary file 1 [file Yang_Robust_Noisy_Correspondence_CVPR_2024_supplemental.pdf]

# Robust Noisy Correspondence Learning with Equivariant Similarity Consistency

## Supplementary Material

### 1. Hyperparameters Analysis

In this section, we add some comparative experiments to analyze our choice of hyperparameters. Following the setting of [2], the division margin  $\alpha_1$  and matching margin  $\alpha_2$  are chosen from  $\{0, 0.04, 0.1\}$  and the weighted factor  $\beta$  is selected from  $\{0.2, 0.5, 1.0\}$ . All experiments are conducted on Flickr30K with a noise ratio of 40%.

| $\alpha_1$ | Image $\rightarrow$ Text |             |             | Text $\rightarrow$ Image |             |             | Sum          |
|------------|--------------------------|-------------|-------------|--------------------------|-------------|-------------|--------------|
|            | R@1                      | R@5         | R@10        | R@1                      | R@5         | R@10        |              |
| 0          | <b>76.1</b>              | <b>93.1</b> | <b>96.4</b> | <b>56.0</b>              | <b>80.8</b> | <b>87.2</b> | <b>489.5</b> |
| 0.04       | <b>76.1</b>              | 91.6        | 96.1        | 54.3                     | 78.6        | 86.2        | 482.9        |
| 0.1        | 72.2                     | 91.8        | 96.1        | 54.2                     | 79.0        | 85.8        | 479.1        |

Table 1. Recall rates with different division margin  $\alpha_1$  in  $l_{ESC}$ .

| $\beta$ | Image $\rightarrow$ Text |             |             | Text $\rightarrow$ Image |             |             | Sum          |
|---------|--------------------------|-------------|-------------|--------------------------|-------------|-------------|--------------|
|         | R@1                      | R@5         | R@10        | R@1                      | R@5         | R@10        |              |
| 0       | 72.5                     | 91.7        | 95.3        | 53.6                     | 79.0        | 86.4        | 478.5        |
| 0.2     | 73.0                     | 92.3        | 95.8        | 55.4                     | <b>81.0</b> | <b>87.4</b> | 484.9        |
| 0.5     | <b>76.1</b>              | <b>93.1</b> | <b>96.4</b> | <b>56.0</b>              | 80.8        | 87.2        | <b>489.5</b> |
| 1       | 74.4                     | 92.5        | 95.5        | 55.6                     | 80.0        | 86.7        | 484.7        |

Table 2. Recall rates with different weighted factor  $\beta$  in  $l_{div}$ .

**The choice of division margin  $\alpha_1$ .** In Tab. 1, the matching model exhibits optimal retrieval performance when the division margin  $\alpha_1$  is equal to 0. In the three experiments above, we evaluate the impact of hyperparameter  $\alpha_1$  on performance by setting  $\beta$  to 0.5 and  $\alpha_2$  to 0. As the division margin  $\alpha_1$  increases, the consistency of equivariant similarity is no longer strictly constrained, resulting in an increased probability of misclassification within the  $\alpha_1$  range and thus a decrease in retrieval performance.

**The choice of weighted factor  $\beta$ .** The different strengths of regularization have a significant impact on the matching model’s ability to filter out noisy samples effectively. Applying a “coarse-to-fine” strategy, we combine the triplet loss with our ESC regularization to divide the training data. As shown in Tab. 2, we conduct experiments separately with  $\beta$  values of 0, 0.2, 0.5, and 1, while simultaneously setting the division margin  $\alpha_1$  and the matching margin  $\alpha_2$  to 0. With the increases of  $\beta$ , our division ESC improves the accuracy compared to not using this regularization ( $\beta = 0$ ). In addition, further increasing the  $\beta$  leads to a decline in performance since the strength of regularization becomes

too large, resulting in the generalization ability drop. When  $\beta$  is set to 0.5, the performance of most recall rates is the highest, where R@5 and R@10 in text-to-image retrieval are a bit lower than when  $\beta$  is set to 0.2. However, given the overall retrieval performance, we still apply  $\beta = 0.5$  in all experiments.

| $\alpha_2$ | Image $\rightarrow$ Text |             |             | Text $\rightarrow$ Image |             |             | Sum          |
|------------|--------------------------|-------------|-------------|--------------------------|-------------|-------------|--------------|
|            | R@1                      | R@5         | R@10        | R@1                      | R@5         | R@10        |              |
| 0          | <b>76.1</b>              | <b>93.1</b> | <b>96.4</b> | <b>56.0</b>              | <b>80.8</b> | 87.2        | <b>489.5</b> |
| 0.04       | 73.1                     | 92.6        | 96.1        | 55.6                     | 80.6        | <b>87.4</b> | 485.4        |
| 0.1        | 73.0                     | 91.9        | 96.0        | 54.9                     | 80.3        | 86.9        | 483.0        |

Table 3. Recall rates with different matching margin  $\alpha_2$  in  $\mathcal{L}_{ESC}$ .

**The choice of matching margin  $\alpha_2$ .** Similar to division margin  $\alpha_1$ , the matching margin  $\alpha_2$  also represents the zero-loss threshold in the regularization term, where no loss is incurred if the difference in cross-instance similarity between two samples is less than this threshold. Observing from Tab. 3, the retrieval accuracy is the highest when  $\alpha_2$  is set to 0.

### 2. Training Pipeline

Our method is trained in a co-teaching manner [1]. The detailed training pipeline is shown in the Fig. 1 and illustrated in the Algorithm 1.

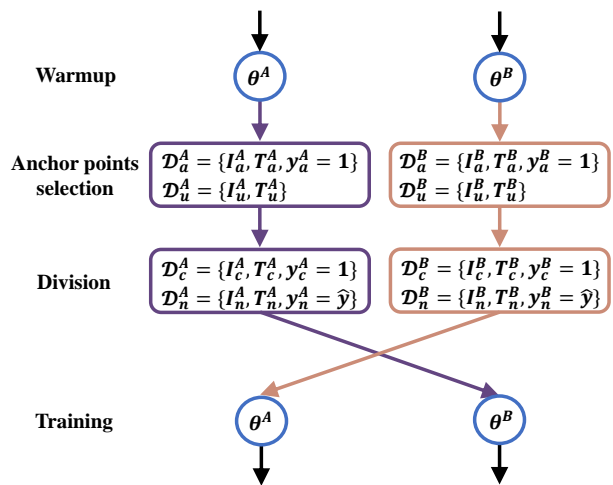

Figure 1. Training pipeline of ESC.

---

**Algorithm 1** The training pipeline of our ESC method
 

---

**Input:** Given training data  $\mathcal{D}$ , matching models  $\theta^A = \{f^A, g^A, S^A\}$  and  $\theta^B = \{f^B, g^B, S^B\}$

- 1: Warmup the models  $(\theta^A, \theta^B)$  using  $l_{hard}$  in Eq. (1)
- 2: **for**  $i = 1 : num\_epochs$  **do**
- 3:   Compute the division triplet loss  $l_{hard}$  using Eq. (1)
- 4:   Select anchor points in  $\mathcal{D}$  and calculate the division regularization  $l_{ESC}$  using Eq. (8)
- 5:   Combine  $l_{hard}$  and  $l_{ESC}$  to acquire total division loss  $l_{div}$  using Eq. (9) and normalize the  $l_{div}$  as  $l_i$
- 6:    $\mathcal{P}^A = \{p_i^A | p_i^A = p(k=0|l_i)\}_{i=1}^N \leftarrow \text{BMM}(\mathcal{D}, B)$
- 7:    $\mathcal{P}^B = \{p_i^B | p_i^B = p(k=0|l_i)\}_{i=1}^N \leftarrow \text{BMM}(\mathcal{D}, A)$
- 8:   **for**  $r \in \{A, B\}$  **do**
- 9:     **for**  $k = num\_steps$  **do**
- 10:      Sample a mini-batch  $\mathcal{B}^k$  from  $\mathcal{D}^r$  for  $\theta^A$  and  $\theta^B$ , respectively
- 11:      Select the anchor point  $(I_a, T_a)$  in this mini-batch  $\mathcal{B}^k$  and obtain the undivided mini-batch  $\mathcal{B}_u^k = \mathcal{B}^k / (I_a, T_a)$
- 12:       $\mathcal{B}_c^k = (I_a, T_a) \cup \{(I_i, T_i, y_i) | p_i^r > \delta, \forall (I_i, T_i) \in \mathcal{B}_u^k\}$
- 13:       $\mathcal{B}_n^k = \{(I_i, T_i, y_i) | p_i^r \leq \delta, \forall (I_i, T_i) \in \mathcal{B}_u^k\}$
- 14:      Refine the labels  $y_i = \hat{y}_i$  of  $\{\mathcal{B}_c^k, \mathcal{B}_n^k\}$  by [3]
- 15:      Train the network  $\theta^r$  on  $\{\hat{\mathcal{B}}_c^k, \hat{\mathcal{B}}_n^k\}$  by optimizing  $\mathcal{L}_{soft}$  in Eq. (13) and  $\mathcal{L}_{ESC}$  in Eq. (14)

**Output:** Matching models  $(\theta^A, \theta^B)$

---

### 3. Retrieval Results

We show some retrieval results of ESC for image-to-text retrieval in Fig. 2, and text-to-image retrieval in Fig. 3.

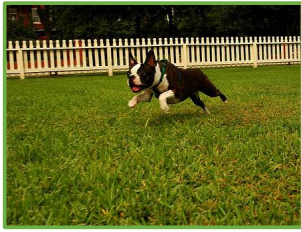

**Top1:** A Boston Terrier is running on lush green grass in front of a white fence.

**Top2:** A black and white dog is running in a grassy garden surrounded by a white fence.

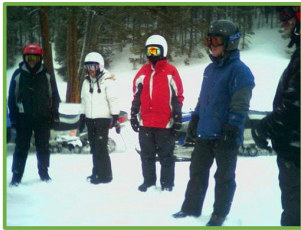

**Top1:** Five people wearing winter clothing, helmets, and ski goggles stand outside in the snow.

**Top2:** Five people wearing winter jackets and helmets stand in the snow, with snowmobiles in the background.

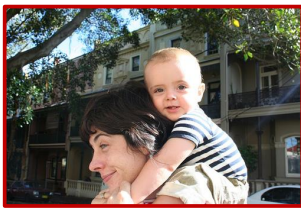

**Top1:** A baby boy in a blue and white striped shirt is sitting on his mother's shoulders.

**Top2:** Asian looking lady holding a baby while sitting and looking at it.

Figure 2. Image-to-text retrieval.

**Text:** A photographer takes a picture of a group of one girl in a pink dress and 10 boys in suits and hats.

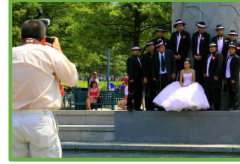

Ground Truth

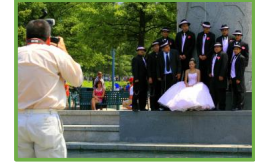

Top1

**Text:** A young female student performing a downward kick to break a board held by her Karate instructor.

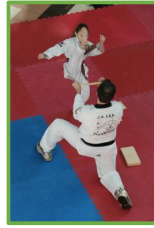

Ground Truth

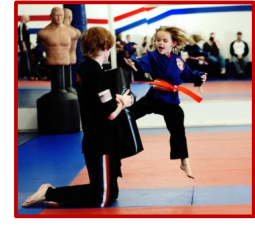

Top1

Figure 3. Text-to-image retrieval.

### References

- [1] Bo Han, Quanming Yao, Xingrui Yu, Gang Niu, Miao Xu, Weihua Hu, Ivor Tsang, and Masashi Sugiyama. Co-teaching: Robust training of deep neural networks with extremely noisy labels. *NeurIPS*, 31, 2018. 1
- [2] Tan Wang, Kevin Lin, Linjie Li, Chung-Ching Lin, Zhengyuan Yang, Hanwang Zhang, Zicheng Liu, and Lijuan Wang. Equivariant similarity for vision-language foundation models. In *ICCV*, pages 11998–12008, 2023. 1

- [3] Shuo Yang, Zhaopan Xu, Kai Wang, Yang You, Hongxun Yao, Tongliang Liu, and Min Xu. Bicro: Noisy correspondence rectification for multi-modality data via bi-directional cross-modal similarity consistency. In *CVPR*, pages 19883–19892, 2023. [2](#)
